# Supplementary material for: Resveratrol Microencapsulation into Electrosprayed Polymeric Carriers for the Treatment of Chronic, Non-Healing Wounds
Source: MDPI journal article supplement (doi:10.3390/pharmaceutics14040853), 2022-04-13
Supplement: s1 [file s1]

## **Supplementary Information**

### **Title**

Resveratrol microencapsulation into electrosprayed polymeric carriers for the treatment of chronic, non-healing wounds

### **Authors:**

Andrea De Pieri (1), Keegan Ocorr (1), Kyle Jerreld (1), Mikkael Lamoca (1), Wolfgang Hitzl (2, 3, 4), Karin Wuertz-Kozak\* (1, 5)

### **Affiliations:**

1. Department of Biomedical Engineering, Rochester Institute of Technology (RIT), 106 Lomb Memorial Rd., Rochester, NY 14623, USA.

2 Research and Innovation Management (RIM), Biostatistics and publication of clinical trial studies, Paracelsus Medical University, 5020 Salzburg, Austria 3. Department of Ophthalmology and Optometry, Paracelsus Medical University, 5020 Salzburg, Austria

4. Research Program Experimental Ophthalmology and Glaucoma Research, Paracelsus Medical University, 5020 Salzburg, Austria

5. Schön Clinic Munich Harlaching, Spine Center, Academic Teaching Hospital and Spine Research Institute of the Paracelsus Medical University Salzburg (Austria), 81547 Munich, Germany.

### **\* Corresponding Authors**

Karin Wuertz-Kozak, Department of Biomedical Engineering, Rochester Institute of Technology (RIT), Rochester, NY, USA. Telephone: +1 (585)-475-7355. Email: [kwbme@rit.edu](mailto:kwbme@rit.edu)

**Supplementary Table S1:** Primer details and gene expression assay IDs.

| <b>Gene</b> | <b>Gene description</b>                                                     | <b>Assay ID</b> | <b>Amplicon length</b> |
|-------------|-----------------------------------------------------------------------------|-----------------|------------------------|
| ACTA2       | Actin, alpha 2, smooth muscle                                               | Hs00426835_g1   | 105                    |
| ADAMTS4     | ADAM metalloproteinase with thrombospondin type 1 motif 4                   | Hs00192708_m1   | 63                     |
| COL1A2      | Collagen type I alpha 2 chain                                               | Hs01028956_m1   | 71                     |
| CXCL8       | C-X-C motif chemokine ligand 8                                              | Hs00174103_m1   | 101                    |
| IL6         | Interleukin 6                                                               | Hs00174131_m1   | 95                     |
| MMP1        | Matrix metalloproteinase 1                                                  | Hs00899658_m1   | 64                     |
| MMP2        | Matrix metalloproteinase 2                                                  | Hs01548727_m1   | 65                     |
| MMP3        | Matrix metalloproteinase 3                                                  | Hs00968305_m1   | 126                    |
| MMP9        | Matrix metalloproteinase 9                                                  | Hs00957562_m1   | 67                     |
| MMP13       | Matrix metalloproteinase 13                                                 | Hs00942584_m1   | 91                     |
| PTGS2       | Prostaglandin-endoperoxide synthase 2                                       | Hs00153133_m1   | 75                     |
| TIMP1       | TIMP metalloproteinase inhibitor 1                                          | Hs01092512_g1   | 78                     |
| TNFAIP6     | TNF alpha induced protein 6                                                 | Hs00200180_m1   | 60                     |
| YWHAZ       | Tyrosine 3-monooxygenase/tryptophan 5-monooxygenase activation protein zeta | Hs01122445_g1   | 62                     |

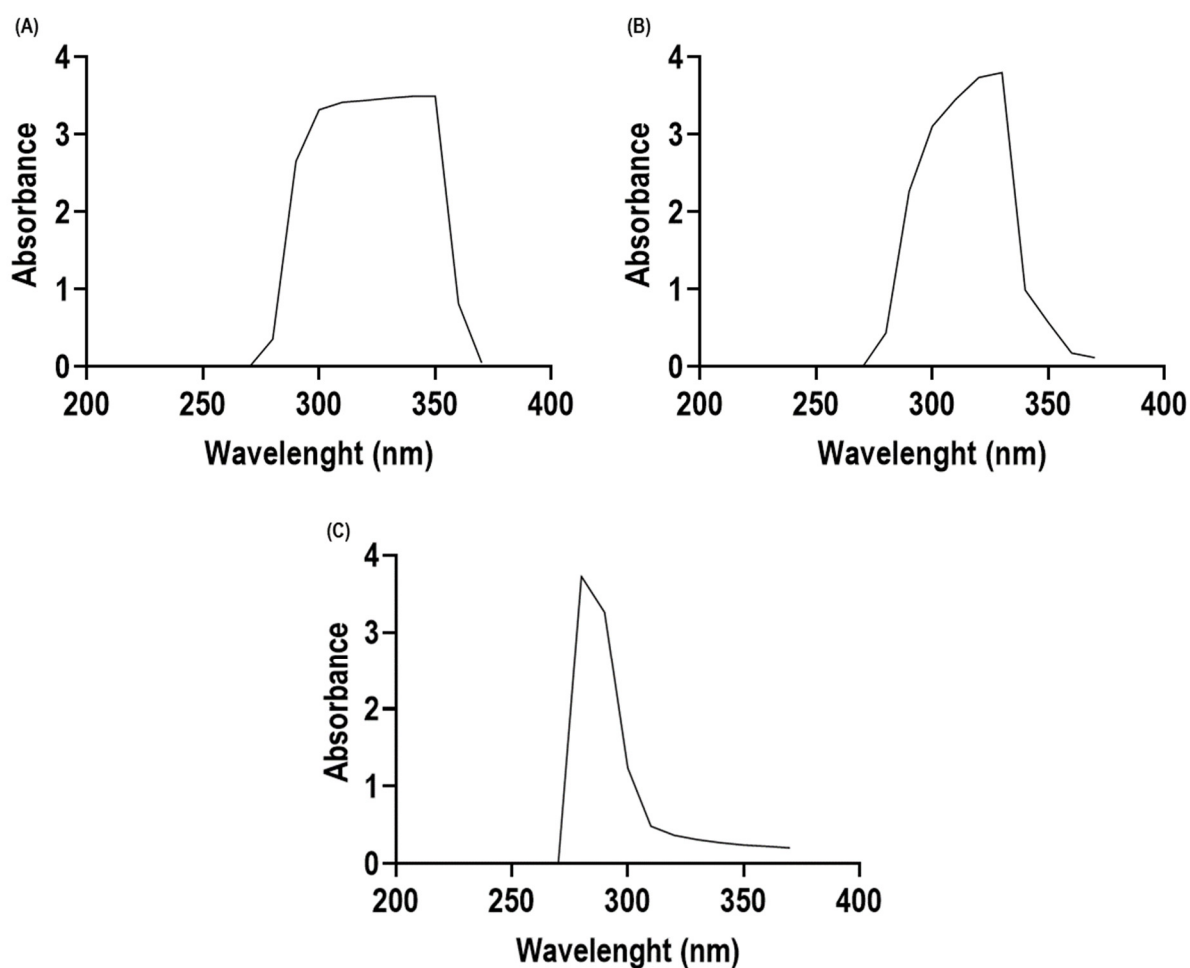

**Supplementary Figure S1:** The wavelength scan for a solution containing 1 mg/mL RSV dissolved in DMSO **(A)** showed a maximum absorbance wavelength of 330 nm. The wavelength scan for a solution containing 1 mg/mL 10% RSV-PCL microparticles dissolved in DMSO **(B)** showed that PCL in the solution did not affect RSV's absorbance spectrum. **(C)** The wavelength scan for a solution containing 1 mg/mL of pure PCL dissolved in DMSO.

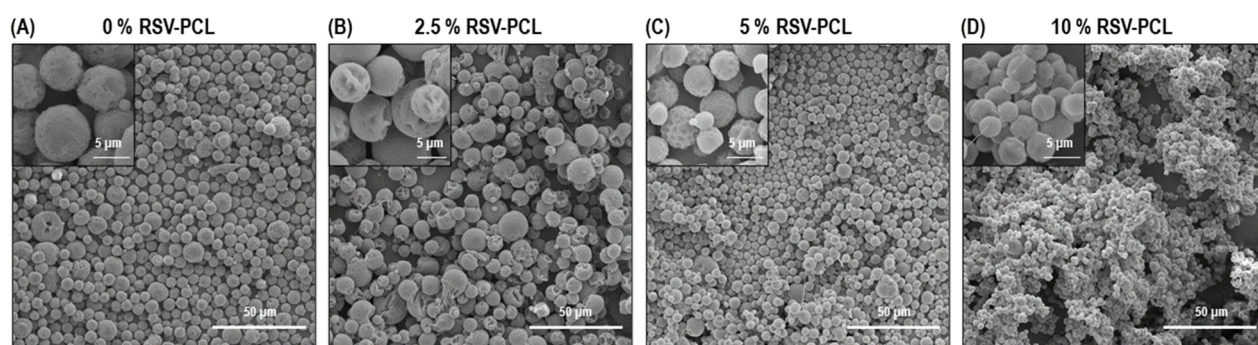

**Supplementary Figure S2:** Scanning electron microscopy analysis of **(A)** 0 % RSV-PCL, **(B)** 2.5 % RSV-PCL, **(C)** 5 % RSV-PCL, and **(D)** 10 % RSV-PCL revealed that all electrospayed samples produced without PVA coating were composed of uniform (fiber-free) particles spherical in shape and exhibited a similar morphology to PVA-coated samples ( $n = 3$  batches).

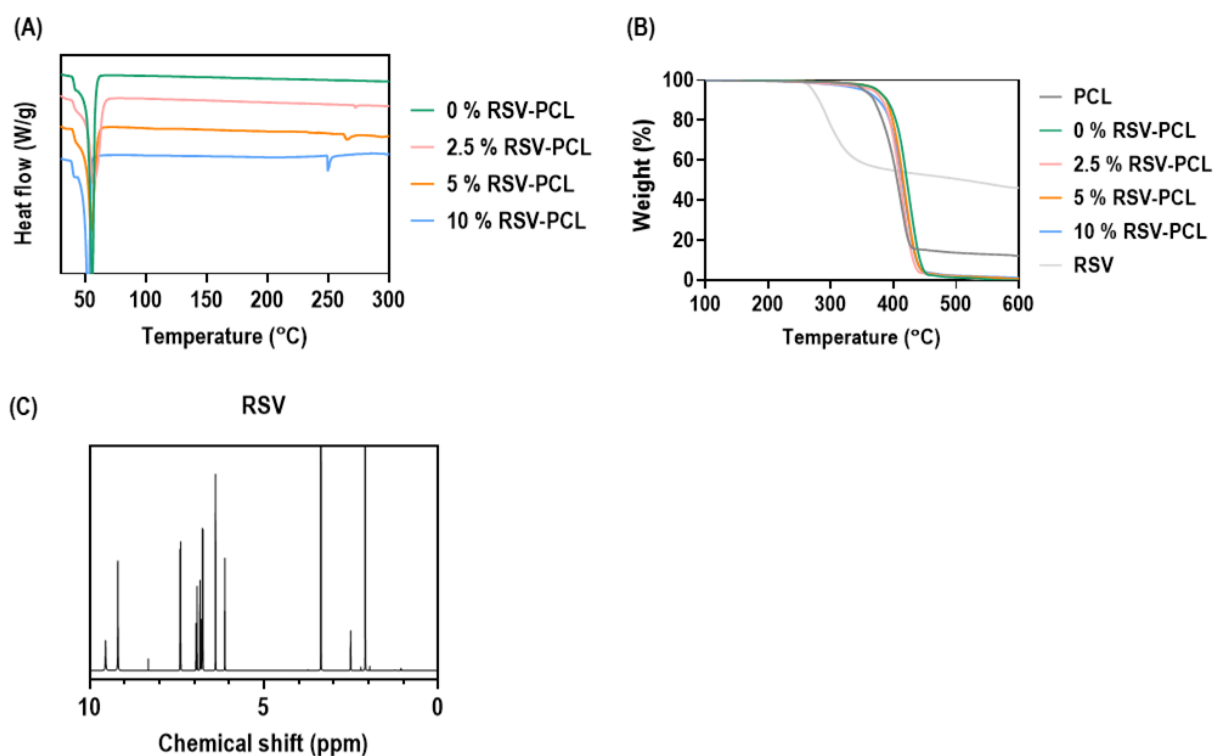

**Supplementary Figure S3:** DSC analysis (A) showed that only in rare cases, negligible amounts of crystalline RSV could be detected at 260 °C. Thermogravimetric (TGA) analysis (B) showed a shift of RSV weight loss upon incorporation in PCL indicating that the polymer enhanced the thermal stability of RSV ( $n = 3$  batches). <sup>1</sup>H-NMR spectrum (C) of control RSV powder.

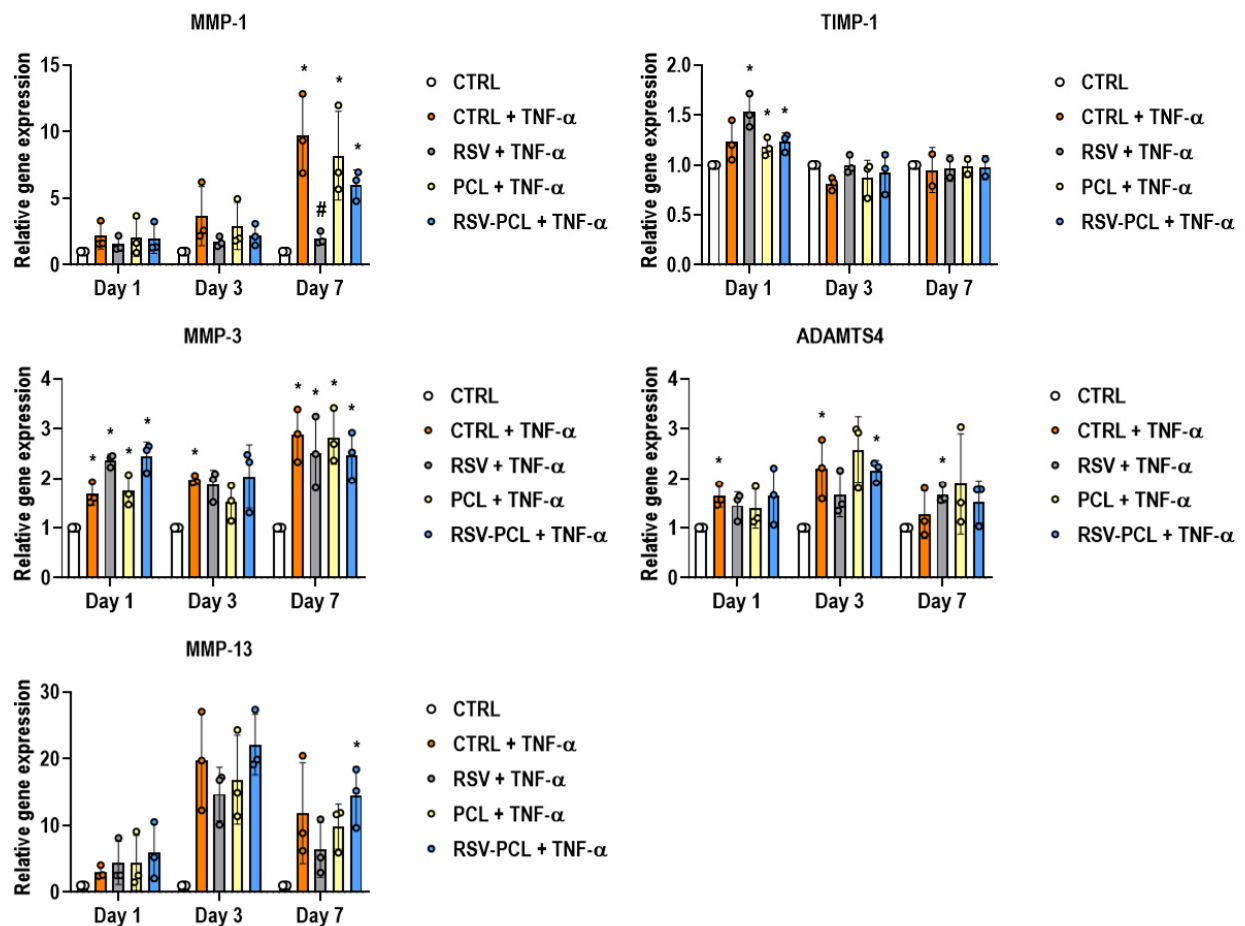

**Supplementary Figure S4:** Effect of 0 % RSV-PCL (PCL) and 10 % RSV-PCL (RSV-PCL) electrosprayed microparticles on gene expression of human dermal fibroblasts. RT-qPCR analysis ( $n = 3$ ) revealed that RSV-PCL microparticles did not reduce ( $p > 0.05$ ) the expression of the ECM remodeling enzymes MMP-1, MMP-3, MMP-13, TIMP-1, and ADAMTS4 in comparison to cells treated with TNF- $\alpha$  (50 ng/mL). Media containing 5  $\mu$ M RSV was used as a positive control. The results were normalized to untreated control (CTRL) cells at each time point. \* indicates statistically significant difference to CTRL group at each time point ( $p < 0.05$ ). Individual values are displayed as dots on bar charts. Error bars represent mean  $\pm$  SD. Generalized linear models and bootstrap-t tests.

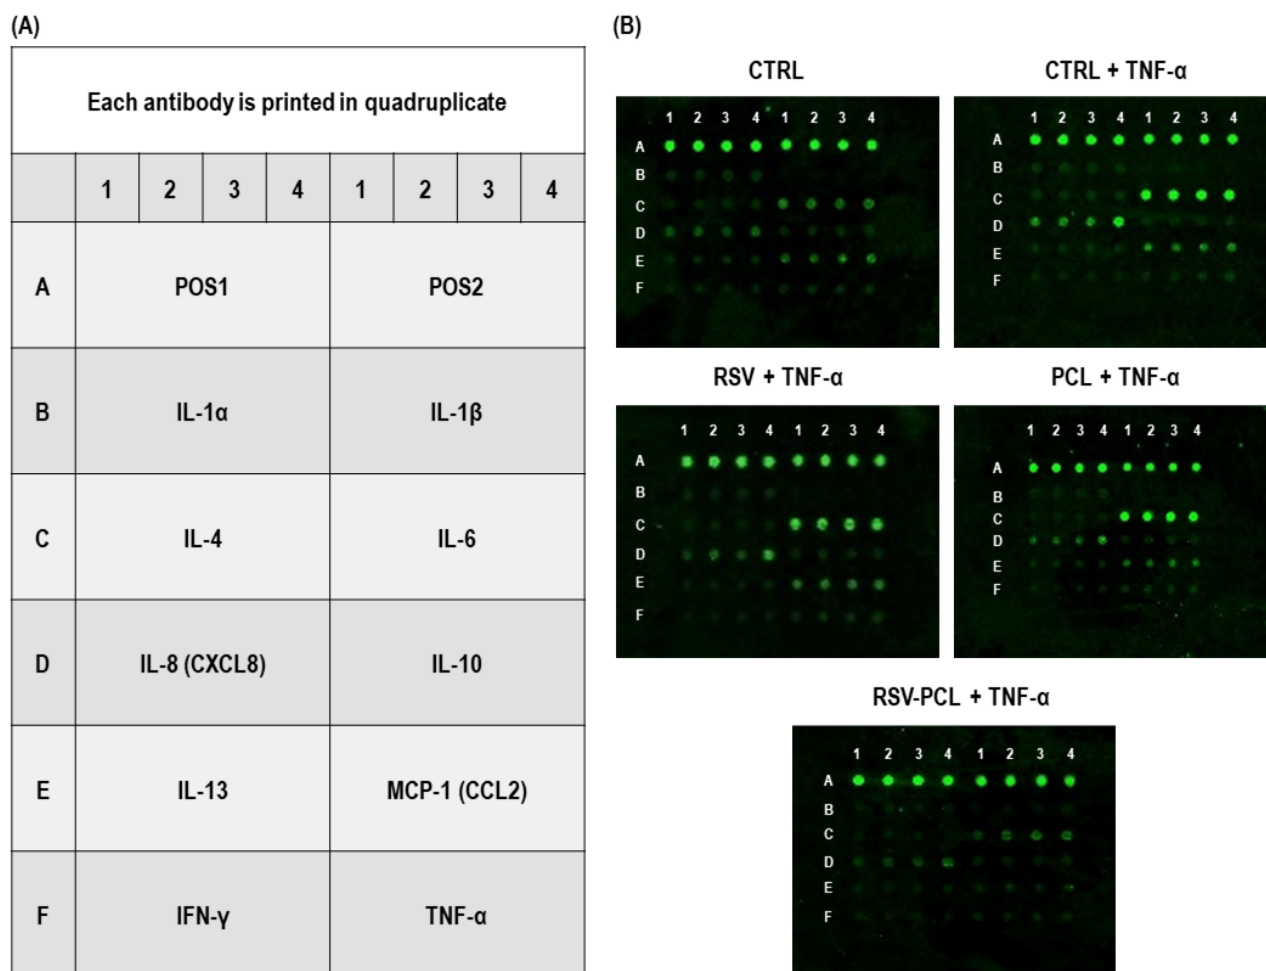

**Supplementary Figure S5:** Multiplex ELISA array setup (A) and fluorescent array scans (B) showed that 10 % RSV-PCL microparticles (100  $\mu\text{g/mL}$ ) significantly ( $p < 0.05$ ) reduced secretion of IL-6, IL-8, and MCP-1 after 7 days of treatment.

**Supplementary Table S2:** Detailed statistical analysis of gene expression results.

| Gene | Timepoint | Variable 1           |    | Variable 2              | Mean 1 | Mean 2 | Std 1  | Std 2  | <i>p</i> -value |
|------|-----------|----------------------|----|-------------------------|--------|--------|--------|--------|-----------------|
| IL-6 | Day 1     | CTRL                 | vs | CTRL + TNF- $\alpha$    | 1.000  | 51.951 | 0.000  | 8.368  | <0.001          |
|      |           | CTRL                 | vs | RSV + TNF- $\alpha$     | 1.000  | 33.819 | 0.000  | 10.547 | <0.001          |
|      |           | CTRL                 | vs | PCL + TNF- $\alpha$     | 1.000  | 57.566 | 0.000  | 12.553 | 0.016           |
|      |           | CTRL                 | vs | RSV-PCL + TNF- $\alpha$ | 1.000  | 22.834 | 0.000  | 3.576  | <0.001          |
|      |           | CTRL + TNF- $\alpha$ | vs | RSV + TNF- $\alpha$     | 51.951 | 33.819 | 8.368  | 10.547 | 0.250           |
|      |           | CTRL + TNF- $\alpha$ | vs | PCL + TNF- $\alpha$     | 51.951 | 57.566 | 8.368  | 12.553 | 0.246           |
|      |           | CTRL + TNF- $\alpha$ | vs | RSV-PCL + TNF- $\alpha$ | 51.951 | 22.834 | 8.368  | 3.576  | 0.025           |
|      |           | RSV + TNF- $\alpha$  | vs | PCL + TNF- $\alpha$     | 33.819 | 57.566 | 10.547 | 12.553 | 0.123           |
|      |           | RSV + TNF- $\alpha$  | vs | RSV-PCL + TNF- $\alpha$ | 33.819 | 22.834 | 10.547 | 3.576  | 0.250           |
|      |           | PCL + TNF- $\alpha$  | vs | RSV-PCL + TNF- $\alpha$ | 57.566 | 22.834 | 12.553 | 3.576  | <0.001          |
|      | Day 3     | CTRL                 | vs | CTRL + TNF- $\alpha$    | 1.000  | 18.166 | 0.000  | 2.723  | <0.001          |
|      |           | CTRL                 | vs | RSV + TNF- $\alpha$     | 1.000  | 11.387 | 0.000  | 1.095  | <0.001          |
|      |           | CTRL                 | vs | PCL + TNF- $\alpha$     | 1.000  | 15.946 | 0.000  | 1.712  | <0.001          |
|      |           | CTRL                 | vs | RSV-PCL + TNF- $\alpha$ | 1.000  | 8.080  | 0.000  | 1.248  | <0.001          |
|      |           | CTRL + TNF- $\alpha$ | vs | RSV + TNF- $\alpha$     | 18.166 | 11.387 | 2.723  | 1.095  | <0.001          |
|      |           | CTRL + TNF- $\alpha$ | vs | PCL + TNF- $\alpha$     | 18.166 | 15.946 | 2.723  | 1.712  | 0.248           |
|      |           | CTRL + TNF- $\alpha$ | vs | RSV-PCL + TNF- $\alpha$ | 18.166 | 8.080  | 2.723  | 1.248  | <0.001          |
|      |           | RSV + TNF- $\alpha$  | vs | PCL + TNF- $\alpha$     | 11.387 | 15.946 | 1.095  | 1.712  | <0.001          |
|      |           | RSV + TNF- $\alpha$  | vs | RSV-PCL + TNF- $\alpha$ | 11.387 | 8.080  | 1.095  | 1.248  | <0.001          |
|      |           | PCL + TNF- $\alpha$  | vs | RSV-PCL + TNF- $\alpha$ | 15.946 | 8.080  | 1.712  | 1.248  | <0.001          |
|      | Day 7     | CTRL                 | vs | CTRL + TNF- $\alpha$    | 1.000  | 17.193 | 0.000  | 1.065  | <0.001          |
|      |           | CTRL                 | vs | RSV + TNF- $\alpha$     | 1.000  | 9.812  | 0.000  | 1.399  | 0.008           |
|      |           | CTRL                 | vs | PCL + TNF- $\alpha$     | 1.000  | 16.399 | 0.000  | 3.954  | <0.001          |
|      |           | CTRL                 | vs | RSV-PCL + TNF- $\alpha$ | 1.000  | 10.028 | 0.000  | 1.569  | <0.001          |
|      |           | CTRL + TNF- $\alpha$ | vs | RSV + TNF- $\alpha$     | 17.193 | 9.812  | 1.065  | 1.399  | <0.001          |
|      |           | CTRL + TNF- $\alpha$ | vs | PCL + TNF- $\alpha$     | 17.193 | 16.399 | 1.065  | 3.954  | 0.485           |



|      |       |                      |    |                         |         |          |         |         |        |
|------|-------|----------------------|----|-------------------------|---------|----------|---------|---------|--------|
| IL-8 |       | CTRL + TNF- $\alpha$ | vs | RSV-PCL + TNF- $\alpha$ | 17.193  | 10.028   | 1.065   | 1.569   | 0.034  |
|      |       | RSV + TNF- $\alpha$  | vs | PCL + TNF- $\alpha$     | 9.812   | 16.399   | 1.399   | 3.954   | 0.237  |
|      |       | RSV + TNF- $\alpha$  | vs | RSV-PCL + TNF- $\alpha$ | 9.812   | 10.028   | 1.399   | 1.569   | 0.739  |
|      |       | PCL + TNF- $\alpha$  | vs | RSV-PCL + TNF- $\alpha$ | 16.399  | 10.028   | 3.954   | 1.569   | <0.001 |
|      | Day 1 | CTRL                 | vs | CTRL + TNF- $\alpha$    | 1.000   | 256.218  | 0.000   | 28.441  | <0.001 |
|      |       | CTRL                 | vs | RSV + TNF- $\alpha$     | 1.000   | 142.197  | 0.000   | 35.033  | 0.019  |
|      |       | CTRL                 | vs | PCL + TNF- $\alpha$     | 1.000   | 235.040  | 0.000   | 34.260  | <0.001 |
|      |       | CTRL                 | vs | RSV-PCL + TNF- $\alpha$ | 1.000   | 131.899  | 0.000   | 29.374  | 0.016  |
|      |       | CTRL + TNF- $\alpha$ | vs | RSV + TNF- $\alpha$     | 256.218 | 142.197  | 28.441  | 35.033  | <0.001 |
|      |       | CTRL + TNF- $\alpha$ | vs | PCL + TNF- $\alpha$     | 256.218 | 235.040  | 28.441  | 34.260  | 0.246  |
|      |       | CTRL + TNF- $\alpha$ | vs | RSV-PCL + TNF- $\alpha$ | 256.218 | 131.899  | 28.441  | 29.374  | 0.010  |
|      |       | RSV + TNF- $\alpha$  | vs | PCL + TNF- $\alpha$     | 142.197 | 235.040  | 35.033  | 34.260  | <0.001 |
|      |       | RSV + TNF- $\alpha$  | vs | RSV-PCL + TNF- $\alpha$ | 142.197 | 131.899  | 35.033  | 29.374  | <0.001 |
|      |       | PCL + TNF- $\alpha$  | vs | RSV-PCL + TNF- $\alpha$ | 235.040 | 131.899  | 34.260  | 29.374  | 0.002  |
|      | Day 3 | CTRL                 | vs | CTRL + TNF- $\alpha$    | 1.000   | 817.277  | 0.000   | 176.229 | 0.015  |
|      |       | CTRL                 | vs | RSV + TNF- $\alpha$     | 1.000   | 264.461  | 0.000   | 89.612  | 0.036  |
|      |       | CTRL                 | vs | PCL + TNF- $\alpha$     | 1.000   | 762.407  | 0.000   | 88.952  | <0.001 |
|      |       | CTRL                 | vs | RSV-PCL + TNF- $\alpha$ | 1.000   | 221.927  | 0.000   | 40.626  | <0.001 |
|      |       | CTRL + TNF- $\alpha$ | vs | RSV + TNF- $\alpha$     | 817.277 | 264.461  | 176.229 | 89.612  | <0.001 |
|      |       | CTRL + TNF- $\alpha$ | vs | PCL + TNF- $\alpha$     | 817.277 | 762.407  | 176.229 | 88.952  | 0.359  |
|      |       | CTRL + TNF- $\alpha$ | vs | RSV-PCL + TNF- $\alpha$ | 817.277 | 221.927  | 176.229 | 40.626  | 0.041  |
|      |       | RSV + TNF- $\alpha$  | vs | PCL + TNF- $\alpha$     | 264.461 | 762.407  | 89.612  | 88.952  | <0.001 |
|      |       | RSV + TNF- $\alpha$  | vs | RSV-PCL + TNF- $\alpha$ | 264.461 | 221.927  | 89.612  | 40.626  | 0.380  |
|      |       | PCL + TNF- $\alpha$  | vs | RSV-PCL + TNF- $\alpha$ | 762.407 | 221.927  | 88.952  | 40.626  | <0.001 |
|      | Day 7 | CTRL                 | vs | CTRL + TNF- $\alpha$    | 1.000   | 2144.710 | 0.000   | 761.985 | <0.001 |
|      |       | CTRL                 | vs | RSV + TNF- $\alpha$     | 1.000   | 484.774  | 0.000   | 138.568 | <0.001 |
|      |       | CTRL                 | vs | PCL + TNF- $\alpha$     | 1.000   | 1851.520 | 0.000   | 375.316 | <0.001 |
|      |       | CTRL                 | vs | RSV-PCL + TNF- $\alpha$ | 1.000   | 532.622  | 0.000   | 118.948 | <0.001 |

|       |       |                      |    |                         |          |          |         |         |        |
|-------|-------|----------------------|----|-------------------------|----------|----------|---------|---------|--------|
|       |       | CTRL + TNF- $\alpha$ | vs | RSV + TNF- $\alpha$     | 2144.710 | 484.774  | 761.985 | 138.568 | <0.001 |
|       |       | CTRL + TNF- $\alpha$ | vs | PCL + TNF- $\alpha$     | 2144.710 | 1851.520 | 761.985 | 375.316 | 0.370  |
|       |       | CTRL + TNF- $\alpha$ | vs | RSV-PCL + TNF- $\alpha$ | 2144.710 | 532.622  | 761.985 | 118.948 | <0.001 |
|       |       | RSV + TNF- $\alpha$  | vs | PCL + TNF- $\alpha$     | 484.774  | 1851.520 | 138.568 | 375.316 | <0.001 |
|       |       | RSV + TNF- $\alpha$  | vs | RSV-PCL + TNF- $\alpha$ | 484.774  | 532.622  | 138.568 | 118.948 | 0.250  |
|       |       | PCL + TNF- $\alpha$  | vs | RSV-PCL + TNF- $\alpha$ | 1851.520 | 532.622  | 375.316 | 118.948 | <0.001 |
| COX-2 | Day 1 | CTRL                 | vs | CTRL + TNF- $\alpha$    | 1.000    | 12.747   | 0.000   | 3.330   | <0.001 |
|       |       | CTRL                 | vs | RSV + TNF- $\alpha$     | 1.000    | 3.839    | 0.000   | 0.610   | <0.001 |
|       |       | CTRL                 | vs | PCL + TNF- $\alpha$     | 1.000    | 11.401   | 0.000   | 2.843   | <0.001 |
|       |       | CTRL                 | vs | RSV-PCL + TNF- $\alpha$ | 1.000    | 2.232    | 0.000   | 0.558   | <0.001 |
|       |       | CTRL + TNF- $\alpha$ | vs | RSV + TNF- $\alpha$     | 12.747   | 3.839    | 3.330   | 0.610   | <0.001 |
|       |       | CTRL + TNF- $\alpha$ | vs | PCL + TNF- $\alpha$     | 12.747   | 11.401   | 3.330   | 2.843   | 0.497  |
|       |       | CTRL + TNF- $\alpha$ | vs | RSV-PCL + TNF- $\alpha$ | 12.747   | 2.232    | 3.330   | 0.558   | <0.001 |
|       |       | RSV + TNF- $\alpha$  | vs | PCL + TNF- $\alpha$     | 3.839    | 11.401   | 0.610   | 2.843   | 0.120  |
|       |       | RSV + TNF- $\alpha$  | vs | RSV-PCL + TNF- $\alpha$ | 3.839    | 2.232    | 0.610   | 0.558   | 0.254  |
|       |       | PCL + TNF- $\alpha$  | vs | RSV-PCL + TNF- $\alpha$ | 11.401   | 2.232    | 2.843   | 0.558   | <0.001 |
|       | Day 3 | CTRL                 | vs | CTRL + TNF- $\alpha$    | 1.000    | 7.475    | 0.000   | 1.871   | <0.001 |
|       |       | CTRL                 | vs | RSV + TNF- $\alpha$     | 1.000    | 1.365    | 0.000   | 0.548   | 0.377  |
|       |       | CTRL                 | vs | PCL + TNF- $\alpha$     | 1.000    | 4.372    | 0.000   | 0.608   | <0.001 |
|       |       | CTRL                 | vs | RSV-PCL + TNF- $\alpha$ | 1.000    | 1.375    | 0.000   | 0.296   | 0.259  |
|       |       | CTRL + TNF- $\alpha$ | vs | RSV + TNF- $\alpha$     | 7.475    | 1.365    | 1.871   | 0.548   | 0.047  |
|       |       | CTRL + TNF- $\alpha$ | vs | PCL + TNF- $\alpha$     | 7.475    | 4.372    | 1.871   | 0.608   | <0.001 |
|       |       | CTRL + TNF- $\alpha$ | vs | RSV-PCL + TNF- $\alpha$ | 7.475    | 1.375    | 1.871   | 0.296   | 0.023  |
|       |       | RSV + TNF- $\alpha$  | vs | PCL + TNF- $\alpha$     | 1.365    | 4.372    | 0.548   | 0.608   | <0.001 |
|       |       | RSV + TNF- $\alpha$  | vs | RSV-PCL + TNF- $\alpha$ | 1.365    | 1.375    | 0.548   | 0.296   | 0.748  |
|       |       | PCL + TNF- $\alpha$  | vs | RSV-PCL + TNF- $\alpha$ | 4.372    | 1.375    | 0.608   | 0.296   | <0.001 |
|       | Day 7 | CTRL                 | vs | CTRL + TNF- $\alpha$    | 1.000    | 7.101    | 0.000   | 1.438   | <0.001 |
|       |       | CTRL                 | vs | RSV + TNF- $\alpha$     | 1.000    | 1.255    | 0.000   | 0.204   | 0.239  |

|       |       |                      |    |                         |       |       |       |       |        |
|-------|-------|----------------------|----|-------------------------|-------|-------|-------|-------|--------|
|       |       | CTRL                 | vs | PCL + TNF- $\alpha$     | 1.000 | 6.622 | 0.000 | 1.144 | <0.001 |
|       |       | CTRL                 | vs | RSV-PCL + TNF- $\alpha$ | 1.000 | 2.297 | 0.000 | 0.768 | <0.001 |
|       |       | CTRL + TNF- $\alpha$ | vs | RSV + TNF- $\alpha$     | 7.101 | 1.255 | 1.438 | 0.204 | <0.001 |
|       |       | CTRL + TNF- $\alpha$ | vs | PCL + TNF- $\alpha$     | 7.101 | 6.622 | 1.438 | 1.144 | 0.495  |
|       |       | CTRL + TNF- $\alpha$ | vs | RSV-PCL + TNF- $\alpha$ | 7.101 | 2.297 | 1.438 | 0.768 | <0.001 |
|       |       | RSV + TNF- $\alpha$  | vs | PCL + TNF- $\alpha$     | 1.255 | 6.622 | 0.204 | 1.144 | <0.001 |
|       |       | RSV + TNF- $\alpha$  | vs | RSV-PCL + TNF- $\alpha$ | 1.255 | 2.297 | 0.204 | 0.768 | 0.248  |
|       |       | PCL + TNF- $\alpha$  | vs | RSV-PCL + TNF- $\alpha$ | 6.622 | 2.297 | 1.144 | 0.768 | <0.001 |
| MMP-1 | Day 1 | CTRL                 | vs | CTRL + TNF- $\alpha$    | 1.000 | 2.178 | 0.000 | 0.990 | 0.249  |
|       |       | CTRL                 | vs | RSV + TNF- $\alpha$     | 1.000 | 1.565 | 0.000 | 0.551 | 0.248  |
|       |       | CTRL                 | vs | PCL + TNF- $\alpha$     | 1.000 | 2.083 | 0.000 | 1.431 | 0.382  |
|       |       | CTRL                 | vs | RSV-PCL + TNF- $\alpha$ | 1.000 | 1.970 | 0.000 | 1.111 | 0.256  |
|       |       | CTRL + TNF- $\alpha$ | vs | RSV + TNF- $\alpha$     | 2.178 | 1.565 | 0.990 | 0.551 | 0.256  |
|       |       | CTRL + TNF- $\alpha$ | vs | PCL + TNF- $\alpha$     | 2.178 | 2.083 | 0.990 | 1.431 | 0.617  |
|       |       | CTRL + TNF- $\alpha$ | vs | RSV-PCL + TNF- $\alpha$ | 2.178 | 1.970 | 0.990 | 1.111 | 0.117  |
|       |       | RSV + TNF- $\alpha$  | vs | PCL + TNF- $\alpha$     | 1.565 | 2.083 | 0.551 | 1.431 | 0.374  |
|       |       | RSV + TNF- $\alpha$  | vs | RSV-PCL + TNF- $\alpha$ | 1.565 | 1.970 | 0.551 | 1.111 | 0.245  |
|       |       | PCL + TNF- $\alpha$  | vs | RSV-PCL + TNF- $\alpha$ | 2.083 | 1.970 | 1.431 | 1.111 | 0.510  |
|       | Day 3 | CTRL                 | vs | CTRL + TNF- $\alpha$    | 1.000 | 3.666 | 0.000 | 2.221 | 0.252  |
|       |       | CTRL                 | vs | RSV + TNF- $\alpha$     | 1.000 | 1.727 | 0.000 | 0.382 | 0.080  |
|       |       | CTRL                 | vs | PCL + TNF- $\alpha$     | 1.000 | 2.922 | 0.000 | 1.766 | 0.255  |
|       |       | CTRL                 | vs | RSV-PCL + TNF- $\alpha$ | 1.000 | 2.233 | 0.000 | 0.811 | 0.119  |
|       |       | CTRL + TNF- $\alpha$ | vs | RSV + TNF- $\alpha$     | 3.666 | 1.727 | 2.221 | 0.382 | 0.241  |
|       |       | CTRL + TNF- $\alpha$ | vs | PCL + TNF- $\alpha$     | 3.666 | 2.922 | 2.221 | 1.766 | 0.238  |
|       |       | CTRL + TNF- $\alpha$ | vs | RSV-PCL + TNF- $\alpha$ | 3.666 | 2.233 | 2.221 | 0.811 | 0.247  |
|       |       | RSV + TNF- $\alpha$  | vs | PCL + TNF- $\alpha$     | 1.727 | 2.922 | 0.382 | 1.766 | 0.241  |
|       |       | RSV + TNF- $\alpha$  | vs | RSV-PCL + TNF- $\alpha$ | 1.727 | 2.233 | 0.382 | 0.811 | 0.127  |
|       |       | PCL + TNF- $\alpha$  | vs | RSV-PCL + TNF- $\alpha$ | 2.922 | 2.233 | 1.766 | 0.811 | 0.369  |

|       |       |                      |    |                         |       |       |       |       |        |
|-------|-------|----------------------|----|-------------------------|-------|-------|-------|-------|--------|
|       | Day 7 | CTRL                 | vs | CTRL + TNF- $\alpha$    | 1.000 | 9.694 | 0.000 | 2.992 | <0.001 |
|       |       | CTRL                 | vs | RSV + TNF- $\alpha$     | 1.000 | 2.000 | 0.000 | 0.477 | 0.248  |
|       |       | CTRL                 | vs | PCL + TNF- $\alpha$     | 1.000 | 8.200 | 0.000 | 3.334 | 0.035  |
|       |       | CTRL                 | vs | RSV-PCL + TNF- $\alpha$ | 1.000 | 6.035 | 0.000 | 1.111 | <0.001 |
|       |       | CTRL + TNF- $\alpha$ | vs | RSV + TNF- $\alpha$     | 9.694 | 2.000 | 2.992 | 0.477 | <0.001 |
|       |       | CTRL + TNF- $\alpha$ | vs | PCL + TNF- $\alpha$     | 9.694 | 8.200 | 2.992 | 3.334 | 0.508  |
|       |       | CTRL + TNF- $\alpha$ | vs | RSV-PCL + TNF- $\alpha$ | 9.694 | 6.035 | 2.992 | 1.111 | 0.255  |
|       |       | RSV + TNF- $\alpha$  | vs | PCL + TNF- $\alpha$     | 2.000 | 8.200 | 0.477 | 3.334 | 0.117  |
|       |       | RSV + TNF- $\alpha$  | vs | RSV-PCL + TNF- $\alpha$ | 2.000 | 6.035 | 0.477 | 1.111 | <0.001 |
|       |       | PCL + TNF- $\alpha$  | vs | RSV-PCL + TNF- $\alpha$ | 8.200 | 6.035 | 3.334 | 1.111 | 0.251  |
| MMP-2 | Day 1 | CTRL                 | vs | CTRL + TNF- $\alpha$    | 1.000 | 2.448 | 0.000 | 0.527 | <0.001 |
|       |       | CTRL                 | vs | RSV + TNF- $\alpha$     | 1.000 | 1.663 | 0.000 | 0.646 | 0.243  |
|       |       | CTRL                 | vs | PCL + TNF- $\alpha$     | 1.000 | 1.840 | 0.000 | 0.705 | 0.129  |
|       |       | CTRL                 | vs | RSV-PCL + TNF- $\alpha$ | 1.000 | 1.457 | 0.000 | 0.745 | 0.236  |
|       |       | CTRL + TNF- $\alpha$ | vs | RSV + TNF- $\alpha$     | 2.448 | 1.663 | 0.527 | 0.646 | 0.046  |
|       |       | CTRL + TNF- $\alpha$ | vs | PCL + TNF- $\alpha$     | 2.448 | 1.840 | 0.527 | 0.705 | 0.251  |
|       |       | CTRL + TNF- $\alpha$ | vs | RSV-PCL + TNF- $\alpha$ | 2.448 | 1.457 | 0.527 | 0.745 | <0.001 |
|       |       | RSV + TNF- $\alpha$  | vs | PCL + TNF- $\alpha$     | 1.663 | 1.840 | 0.646 | 0.705 | 0.365  |
|       |       | RSV + TNF- $\alpha$  | vs | RSV-PCL + TNF- $\alpha$ | 1.663 | 1.457 | 0.646 | 0.745 | <0.001 |
|       |       | PCL + TNF- $\alpha$  | vs | RSV-PCL + TNF- $\alpha$ | 1.840 | 1.457 | 0.705 | 0.745 | 0.250  |
|       | Day 3 | CTRL                 | vs | CTRL + TNF- $\alpha$    | 1.000 | 1.437 | 0.000 | 0.232 | <0.001 |
|       |       | CTRL                 | vs | RSV + TNF- $\alpha$     | 1.000 | 0.968 | 0.000 | 0.361 | 0.488  |
|       |       | CTRL                 | vs | PCL + TNF- $\alpha$     | 1.000 | 1.255 | 0.000 | 0.380 | 0.243  |
|       |       | CTRL                 | vs | RSV-PCL + TNF- $\alpha$ | 1.000 | 0.829 | 0.000 | 0.451 | 0.503  |
|       |       | CTRL + TNF- $\alpha$ | vs | RSV + TNF- $\alpha$     | 1.437 | 0.968 | 0.232 | 0.361 | <0.001 |
|       |       | CTRL + TNF- $\alpha$ | vs | PCL + TNF- $\alpha$     | 1.437 | 1.255 | 0.232 | 0.380 | 0.252  |
|       |       | CTRL + TNF- $\alpha$ | vs | RSV-PCL + TNF- $\alpha$ | 1.437 | 0.829 | 0.232 | 0.451 | <0.001 |
|       |       | RSV + TNF- $\alpha$  | vs | PCL + TNF- $\alpha$     | 0.968 | 1.255 | 0.361 | 0.380 | 0.125  |

|       |       |                      |    |                         |       |       |       |       |        |
|-------|-------|----------------------|----|-------------------------|-------|-------|-------|-------|--------|
|       |       | RSV + TNF- $\alpha$  | vs | RSV-PCL + TNF- $\alpha$ | 0.968 | 0.829 | 0.361 | 0.451 | 0.121  |
|       |       | PCL + TNF- $\alpha$  | vs | RSV-PCL + TNF- $\alpha$ | 1.255 | 0.829 | 0.380 | 0.451 | 0.243  |
|       | Day 7 | CTRL                 | vs | CTRL + TNF- $\alpha$    | 1.000 | 1.438 | 0.000 | 0.577 | 0.249  |
|       |       | CTRL                 | vs | RSV + TNF- $\alpha$     | 1.000 | 1.254 | 0.000 | 0.278 | 0.248  |
|       |       | CTRL                 | vs | PCL + TNF- $\alpha$     | 1.000 | 1.659 | 0.000 | 0.332 | <0.001 |
|       |       | CTRL                 | vs | RSV-PCL + TNF- $\alpha$ | 1.000 | 1.294 | 0.000 | 0.492 | 0.371  |
|       |       | CTRL + TNF- $\alpha$ | vs | RSV + TNF- $\alpha$     | 1.438 | 1.254 | 0.577 | 0.278 | 0.384  |
|       |       | CTRL + TNF- $\alpha$ | vs | PCL + TNF- $\alpha$     | 1.438 | 1.659 | 0.577 | 0.332 | 0.382  |
|       |       | CTRL + TNF- $\alpha$ | vs | RSV-PCL + TNF- $\alpha$ | 1.438 | 1.294 | 0.577 | 0.492 | 0.504  |
|       |       | RSV + TNF- $\alpha$  | vs | PCL + TNF- $\alpha$     | 1.254 | 1.659 | 0.278 | 0.332 | <0.001 |
|       |       | RSV + TNF- $\alpha$  | vs | RSV-PCL + TNF- $\alpha$ | 1.254 | 1.294 | 0.278 | 0.492 | 0.511  |
|       |       | PCL + TNF- $\alpha$  | vs | RSV-PCL + TNF- $\alpha$ | 1.659 | 1.294 | 0.332 | 0.492 | <0.001 |
| MMP-3 | Day 1 | CTRL                 | vs | CTRL + TNF- $\alpha$    | 1.000 | 1.678 | 0.000 | 0.222 | <0.001 |
|       |       | CTRL                 | vs | RSV + TNF- $\alpha$     | 1.000 | 2.367 | 0.000 | 0.124 | <0.001 |
|       |       | CTRL                 | vs | PCL + TNF- $\alpha$     | 1.000 | 1.738 | 0.000 | 0.308 | <0.001 |
|       |       | CTRL                 | vs | RSV-PCL + TNF- $\alpha$ | 1.000 | 2.443 | 0.000 | 0.292 | <0.001 |
|       |       | CTRL + TNF- $\alpha$ | vs | RSV + TNF- $\alpha$     | 1.678 | 2.367 | 0.222 | 0.124 | 0.250  |
|       |       | CTRL + TNF- $\alpha$ | vs | PCL + TNF- $\alpha$     | 1.678 | 1.738 | 0.222 | 0.308 | 0.754  |
|       |       | CTRL + TNF- $\alpha$ | vs | RSV-PCL + TNF- $\alpha$ | 1.678 | 2.443 | 0.222 | 0.292 | 0.245  |
|       |       | RSV + TNF- $\alpha$  | vs | PCL + TNF- $\alpha$     | 2.367 | 1.738 | 0.124 | 0.308 | 0.255  |
|       |       | RSV + TNF- $\alpha$  | vs | RSV-PCL + TNF- $\alpha$ | 2.367 | 2.443 | 0.124 | 0.292 | 0.388  |
|       |       | PCL + TNF- $\alpha$  | vs | RSV-PCL + TNF- $\alpha$ | 1.738 | 2.443 | 0.308 | 0.292 | <0.001 |
|       | Day 3 | CTRL                 | vs | CTRL + TNF- $\alpha$    | 1.000 | 1.967 | 0.000 | 0.080 | <0.001 |
|       |       | CTRL                 | vs | RSV + TNF- $\alpha$     | 1.000 | 1.862 | 0.000 | 0.306 | 0.133  |
|       |       | CTRL                 | vs | PCL + TNF- $\alpha$     | 1.000 | 1.510 | 0.000 | 0.356 | <0.001 |
|       |       | CTRL                 | vs | RSV-PCL + TNF- $\alpha$ | 1.000 | 2.038 | 0.000 | 0.640 | 0.259  |
|       |       | CTRL + TNF- $\alpha$ | vs | RSV + TNF- $\alpha$     | 1.967 | 1.862 | 0.080 | 0.306 | 0.506  |
|       |       | CTRL + TNF- $\alpha$ | vs | PCL + TNF- $\alpha$     | 1.967 | 1.510 | 0.080 | 0.356 | 0.241  |

|       |       |                      |    |                         |        |        |        |        |        |
|-------|-------|----------------------|----|-------------------------|--------|--------|--------|--------|--------|
|       |       | CTRL + TNF- $\alpha$ | vs | RSV-PCL + TNF- $\alpha$ | 1.967  | 2.038  | 0.080  | 0.640  | 0.753  |
|       |       | RSV + TNF- $\alpha$  | vs | PCL + TNF- $\alpha$     | 1.862  | 1.510  | 0.306  | 0.356  | <0.001 |
|       |       | RSV + TNF- $\alpha$  | vs | RSV-PCL + TNF- $\alpha$ | 1.862  | 2.038  | 0.306  | 0.640  | 0.488  |
|       |       | PCL + TNF- $\alpha$  | vs | RSV-PCL + TNF- $\alpha$ | 1.510  | 2.038  | 0.356  | 0.640  | 0.122  |
|       | Day 7 | CTRL                 | vs | CTRL + TNF- $\alpha$    | 1.000  | 2.871  | 0.000  | 0.529  | <0.001 |
|       |       | CTRL                 | vs | RSV + TNF- $\alpha$     | 1.000  | 2.517  | 0.000  | 0.718  | <0.001 |
|       |       | CTRL                 | vs | PCL + TNF- $\alpha$     | 1.000  | 2.826  | 0.000  | 0.539  | <0.001 |
|       |       | CTRL                 | vs | RSV-PCL + TNF- $\alpha$ | 1.000  | 2.470  | 0.000  | 0.484  | <0.001 |
|       |       | CTRL + TNF- $\alpha$ | vs | RSV + TNF- $\alpha$     | 2.871  | 2.517  | 0.529  | 0.718  | 0.367  |
|       |       | CTRL + TNF- $\alpha$ | vs | PCL + TNF- $\alpha$     | 2.871  | 2.826  | 0.529  | 0.539  | 0.494  |
|       |       | CTRL + TNF- $\alpha$ | vs | RSV-PCL + TNF- $\alpha$ | 2.871  | 2.470  | 0.529  | 0.484  | 0.241  |
|       |       | RSV + TNF- $\alpha$  | vs | PCL + TNF- $\alpha$     | 2.517  | 2.826  | 0.718  | 0.539  | 0.500  |
|       |       | RSV + TNF- $\alpha$  | vs | RSV-PCL + TNF- $\alpha$ | 2.517  | 2.470  | 0.718  | 0.484  | 0.751  |
|       |       | PCL + TNF- $\alpha$  | vs | RSV-PCL + TNF- $\alpha$ | 2.826  | 2.470  | 0.539  | 0.484  | <0.001 |
| MMP-9 | Day 1 | CTRL                 | vs | CTRL + TNF- $\alpha$    | 1.000  | 43.767 | 0.000  | 12.959 | 0.029  |
|       |       | CTRL                 | vs | RSV + TNF- $\alpha$     | 1.000  | 13.082 | 0.000  | 5.108  | 0.123  |
|       |       | CTRL                 | vs | PCL + TNF- $\alpha$     | 1.000  | 22.485 | 0.000  | 6.570  | <0.001 |
|       |       | CTRL                 | vs | RSV-PCL + TNF- $\alpha$ | 1.000  | 13.661 | 0.000  | 3.790  | <0.001 |
|       |       | CTRL + TNF- $\alpha$ | vs | RSV + TNF- $\alpha$     | 43.767 | 13.082 | 12.959 | 5.108  | <0.001 |
|       |       | CTRL + TNF- $\alpha$ | vs | PCL + TNF- $\alpha$     | 43.767 | 22.485 | 12.959 | 6.570  | <0.001 |
|       |       | CTRL + TNF- $\alpha$ | vs | RSV-PCL + TNF- $\alpha$ | 43.767 | 13.661 | 12.959 | 3.790  | 0.031  |
|       |       | RSV + TNF- $\alpha$  | vs | PCL + TNF- $\alpha$     | 13.082 | 22.485 | 5.108  | 6.570  | <0.001 |
|       |       | RSV + TNF- $\alpha$  | vs | RSV-PCL + TNF- $\alpha$ | 13.082 | 13.661 | 5.108  | 3.790  | 0.492  |
|       |       | PCL + TNF- $\alpha$  | vs | RSV-PCL + TNF- $\alpha$ | 22.485 | 13.661 | 6.570  | 3.790  | <0.001 |
|       | Day 3 | CTRL                 | vs | CTRL + TNF- $\alpha$    | 1.000  | 41.279 | 0.000  | 13.601 | <0.001 |
|       |       | CTRL                 | vs | RSV + TNF- $\alpha$     | 1.000  | 24.285 | 0.000  | 9.519  | 0.245  |
|       |       | CTRL                 | vs | PCL + TNF- $\alpha$     | 1.000  | 27.305 | 0.000  | 8.600  | <0.001 |
|       |       | CTRL                 | vs | RSV-PCL + TNF- $\alpha$ | 1.000  | 22.608 | 0.000  | 5.692  | <0.001 |

|        |       |                      |    |                         |        |        |        |       |        |
|--------|-------|----------------------|----|-------------------------|--------|--------|--------|-------|--------|
|        |       | CTRL + TNF- $\alpha$ | vs | RSV + TNF- $\alpha$     | 41.279 | 24.285 | 13.601 | 9.519 | <0.001 |
|        |       | CTRL + TNF- $\alpha$ | vs | PCL + TNF- $\alpha$     | 41.279 | 27.305 | 13.601 | 8.600 | <0.001 |
|        |       | CTRL + TNF- $\alpha$ | vs | RSV-PCL + TNF- $\alpha$ | 41.279 | 22.608 | 13.601 | 5.692 | 0.245  |
|        |       | RSV + TNF- $\alpha$  | vs | PCL + TNF- $\alpha$     | 24.285 | 27.305 | 9.519  | 8.600 | 0.252  |
|        |       | RSV + TNF- $\alpha$  | vs | RSV-PCL + TNF- $\alpha$ | 24.285 | 22.608 | 9.519  | 5.692 | 0.511  |
|        |       | PCL + TNF- $\alpha$  | vs | RSV-PCL + TNF- $\alpha$ | 27.305 | 22.608 | 8.600  | 5.692 | <0.001 |
|        | Day 7 | CTRL                 | vs | CTRL + TNF- $\alpha$    | 1.000  | 54.991 | 0.000  | 7.624 | 0.006  |
|        |       | CTRL                 | vs | RSV + TNF- $\alpha$     | 1.000  | 27.840 | 0.000  | 9.295 | <0.001 |
|        |       | CTRL                 | vs | PCL + TNF- $\alpha$     | 1.000  | 31.546 | 0.000  | 3.952 | <0.001 |
|        |       | CTRL                 | vs | RSV-PCL + TNF- $\alpha$ | 1.000  | 28.054 | 0.000  | 5.565 | <0.001 |
|        |       | CTRL + TNF- $\alpha$ | vs | RSV + TNF- $\alpha$     | 54.991 | 27.840 | 7.624  | 9.295 | <0.001 |
|        |       | CTRL + TNF- $\alpha$ | vs | PCL + TNF- $\alpha$     | 54.991 | 31.546 | 7.624  | 3.952 | <0.001 |
|        |       | CTRL + TNF- $\alpha$ | vs | RSV-PCL + TNF- $\alpha$ | 54.991 | 28.054 | 7.624  | 5.565 | <0.001 |
|        |       | RSV + TNF- $\alpha$  | vs | PCL + TNF- $\alpha$     | 27.840 | 31.546 | 9.295  | 3.952 | 0.502  |
|        |       | RSV + TNF- $\alpha$  | vs | RSV-PCL + TNF- $\alpha$ | 27.840 | 28.054 | 9.295  | 5.565 | 0.752  |
|        |       | PCL + TNF- $\alpha$  | vs | RSV-PCL + TNF- $\alpha$ | 31.546 | 28.054 | 3.952  | 5.565 | 0.375  |
| MMP-13 | Day 1 | CTRL                 | vs | CTRL + TNF- $\alpha$    | 1.000  | 3.034  | 0.000  | 0.887 | 0.244  |
|        |       | CTRL                 | vs | RSV + TNF- $\alpha$     | 1.000  | 4.404  | 0.000  | 3.239 | 0.249  |
|        |       | CTRL                 | vs | PCL + TNF- $\alpha$     | 1.000  | 4.374  | 0.000  | 4.107 | 0.254  |
|        |       | CTRL                 | vs | RSV-PCL + TNF- $\alpha$ | 1.000  | 5.944  | 0.000  | 4.271 | 0.122  |
|        |       | CTRL + TNF- $\alpha$ | vs | RSV + TNF- $\alpha$     | 3.034  | 4.404  | 0.887  | 3.239 | 0.363  |
|        |       | CTRL + TNF- $\alpha$ | vs | PCL + TNF- $\alpha$     | 3.034  | 4.374  | 0.887  | 4.107 | 0.484  |
|        |       | CTRL + TNF- $\alpha$ | vs | RSV-PCL + TNF- $\alpha$ | 3.034  | 5.944  | 0.887  | 4.271 | 0.238  |
|        |       | RSV + TNF- $\alpha$  | vs | PCL + TNF- $\alpha$     | 4.404  | 4.374  | 3.239  | 4.107 | 0.746  |
|        |       | RSV + TNF- $\alpha$  | vs | RSV-PCL + TNF- $\alpha$ | 4.404  | 5.944  | 3.239  | 4.271 | 0.241  |
|        |       | PCL + TNF- $\alpha$  | vs | RSV-PCL + TNF- $\alpha$ | 4.374  | 5.944  | 4.107  | 4.271 | <0.001 |
|        | Day 3 | CTRL                 | vs | CTRL + TNF- $\alpha$    | 1.000  | 19.694 | 0.000  | 7.395 | <0.001 |
|        |       | CTRL                 | vs | RSV + TNF- $\alpha$     | 1.000  | 14.716 | 0.000  | 3.996 | 0.027  |

|        |       |                      |    |                         |        |        |       |       |        |
|--------|-------|----------------------|----|-------------------------|--------|--------|-------|-------|--------|
|        |       | CTRL                 | vs | PCL + TNF- $\alpha$     | 1.000  | 16.871 | 0.000 | 6.671 | <0.001 |
|        |       | CTRL                 | vs | RSV-PCL + TNF- $\alpha$ | 1.000  | 22.144 | 0.000 | 4.543 | 0.015  |
|        |       | CTRL + TNF- $\alpha$ | vs | RSV + TNF- $\alpha$     | 19.694 | 14.716 | 7.395 | 3.996 | 0.247  |
|        |       | CTRL + TNF- $\alpha$ | vs | PCL + TNF- $\alpha$     | 19.694 | 16.871 | 7.395 | 6.671 | <0.001 |
|        |       | CTRL + TNF- $\alpha$ | vs | RSV-PCL + TNF- $\alpha$ | 19.694 | 22.144 | 7.395 | 4.543 | 0.499  |
|        |       | RSV + TNF- $\alpha$  | vs | PCL + TNF- $\alpha$     | 14.716 | 16.871 | 3.996 | 6.671 | 0.372  |
|        |       | RSV + TNF- $\alpha$  | vs | RSV-PCL + TNF- $\alpha$ | 14.716 | 22.144 | 3.996 | 4.543 | 0.246  |
|        |       | PCL + TNF- $\alpha$  | vs | RSV-PCL + TNF- $\alpha$ | 16.871 | 22.144 | 6.671 | 4.543 | 0.373  |
|        | Day 7 | CTRL                 | vs | CTRL + TNF- $\alpha$    | 1.000  | 11.842 | 0.000 | 7.586 | 0.250  |
|        |       | CTRL                 | vs | RSV + TNF- $\alpha$     | 1.000  | 6.369  | 0.000 | 4.126 | 0.248  |
|        |       | CTRL                 | vs | PCL + TNF- $\alpha$     | 1.000  | 9.835  | 0.000 | 3.373 | 0.251  |
|        |       | CTRL                 | vs | RSV-PCL + TNF- $\alpha$ | 1.000  | 14.401 | 0.000 | 4.423 | <0.001 |
|        |       | CTRL + TNF- $\alpha$ | vs | RSV + TNF- $\alpha$     | 11.842 | 6.369  | 7.586 | 4.126 | 0.261  |
|        |       | CTRL + TNF- $\alpha$ | vs | PCL + TNF- $\alpha$     | 11.842 | 9.835  | 7.586 | 3.373 | 0.492  |
|        |       | CTRL + TNF- $\alpha$ | vs | RSV-PCL + TNF- $\alpha$ | 11.842 | 14.401 | 7.586 | 4.423 | 0.377  |
|        |       | RSV + TNF- $\alpha$  | vs | PCL + TNF- $\alpha$     | 6.369  | 9.835  | 4.126 | 3.373 | 0.127  |
|        |       | RSV + TNF- $\alpha$  | vs | RSV-PCL + TNF- $\alpha$ | 6.369  | 14.401 | 4.126 | 4.423 | <0.001 |
|        |       | PCL + TNF- $\alpha$  | vs | RSV-PCL + TNF- $\alpha$ | 9.835  | 14.401 | 3.373 | 4.423 | 0.261  |
| TIMP-1 | Day 1 | CTRL                 | vs | CTRL + TNF- $\alpha$    | 1.000  | 1.235  | 0.000 | 0.201 | 0.118  |
|        |       | CTRL                 | vs | RSV + TNF- $\alpha$     | 1.000  | 1.533  | 0.000 | 0.169 | 0.031  |
|        |       | CTRL                 | vs | PCL + TNF- $\alpha$     | 1.000  | 1.180  | 0.000 | 0.091 | 0.075  |
|        |       | CTRL                 | vs | RSV-PCL + TNF- $\alpha$ | 1.000  | 1.229  | 0.000 | 0.091 | 0.048  |
|        |       | CTRL + TNF- $\alpha$ | vs | RSV + TNF- $\alpha$     | 1.235  | 1.533  | 0.201 | 0.169 | 0.125  |
|        |       | CTRL + TNF- $\alpha$ | vs | PCL + TNF- $\alpha$     | 1.235  | 1.180  | 0.201 | 0.091 | 0.502  |
|        |       | CTRL + TNF- $\alpha$ | vs | RSV-PCL + TNF- $\alpha$ | 1.235  | 1.229  | 0.201 | 0.091 | 0.737  |
|        |       | RSV + TNF- $\alpha$  | vs | PCL + TNF- $\alpha$     | 1.533  | 1.180  | 0.169 | 0.091 | <0.001 |
|        |       | RSV + TNF- $\alpha$  | vs | RSV-PCL + TNF- $\alpha$ | 1.533  | 1.229  | 0.169 | 0.091 | 0.248  |
|        |       | PCL + TNF- $\alpha$  | vs | RSV-PCL + TNF- $\alpha$ | 1.180  | 1.229  | 0.091 | 0.091 | 0.490  |



|       |       |                      |    |                         |       |       |       |       |        |
|-------|-------|----------------------|----|-------------------------|-------|-------|-------|-------|--------|
|       | Day 3 | CTRL                 | vs | CTRL + TNF- $\alpha$    | 1.000 | 0.813 | 0.000 | 0.064 | <0.001 |
|       |       | CTRL                 | vs | RSV + TNF- $\alpha$     | 1.000 | 1.000 | 0.000 | 0.091 | 0.746  |
|       |       | CTRL                 | vs | PCL + TNF- $\alpha$     | 1.000 | 0.871 | 0.000 | 0.176 | 0.258  |
|       |       | CTRL                 | vs | RSV-PCL + TNF- $\alpha$ | 1.000 | 0.924 | 0.000 | 0.202 | 0.378  |
|       |       | CTRL + TNF- $\alpha$ | vs | RSV + TNF- $\alpha$     | 0.813 | 1.000 | 0.064 | 0.091 | 0.256  |
|       |       | CTRL + TNF- $\alpha$ | vs | PCL + TNF- $\alpha$     | 0.813 | 0.871 | 0.064 | 0.176 | 0.367  |
|       |       | CTRL + TNF- $\alpha$ | vs | RSV-PCL + TNF- $\alpha$ | 0.813 | 0.924 | 0.064 | 0.202 | 0.492  |
|       |       | RSV + TNF- $\alpha$  | vs | PCL + TNF- $\alpha$     | 1.000 | 0.871 | 0.091 | 0.176 | 0.498  |
|       |       | RSV + TNF- $\alpha$  | vs | RSV-PCL + TNF- $\alpha$ | 1.000 | 0.924 | 0.091 | 0.202 | 0.499  |
|       |       | PCL + TNF- $\alpha$  | vs | RSV-PCL + TNF- $\alpha$ | 0.871 | 0.924 | 0.176 | 0.202 | 0.629  |
|       | Day 7 | CTRL                 | vs | CTRL + TNF- $\alpha$    | 1.000 | 0.950 | 0.000 | 0.226 | 0.804  |
|       |       | CTRL                 | vs | RSV + TNF- $\alpha$     | 1.000 | 0.969 | 0.000 | 0.132 | 0.793  |
|       |       | CTRL                 | vs | PCL + TNF- $\alpha$     | 1.000 | 0.984 | 0.000 | 0.107 | 0.863  |
|       |       | CTRL                 | vs | RSV-PCL + TNF- $\alpha$ | 1.000 | 0.974 | 0.000 | 0.121 | 0.808  |
|       |       | CTRL + TNF- $\alpha$ | vs | RSV + TNF- $\alpha$     | 0.950 | 0.969 | 0.226 | 0.132 | 0.821  |
|       |       | CTRL + TNF- $\alpha$ | vs | PCL + TNF- $\alpha$     | 0.950 | 0.984 | 0.226 | 0.107 | 0.755  |
|       |       | CTRL + TNF- $\alpha$ | vs | RSV-PCL + TNF- $\alpha$ | 0.950 | 0.974 | 0.226 | 0.121 | 0.800  |
|       |       | RSV + TNF- $\alpha$  | vs | PCL + TNF- $\alpha$     | 0.969 | 0.984 | 0.132 | 0.107 | 0.557  |
|       |       | RSV + TNF- $\alpha$  | vs | RSV-PCL + TNF- $\alpha$ | 0.969 | 0.974 | 0.132 | 0.121 | 0.644  |
|       |       | PCL + TNF- $\alpha$  | vs | RSV-PCL + TNF- $\alpha$ | 0.984 | 0.974 | 0.107 | 0.121 | 0.500  |
| Col 1 | Day 1 | CTRL                 | vs | CTRL + TNF- $\alpha$    | 1.000 | 1.071 | 0.000 | 0.325 | 0.741  |
|       |       | CTRL                 | vs | RSV + TNF- $\alpha$     | 1.000 | 1.095 | 0.000 | 0.507 | 0.776  |
|       |       | CTRL                 | vs | PCL + TNF- $\alpha$     | 1.000 | 0.735 | 0.000 | 0.331 | 0.299  |
|       |       | CTRL                 | vs | RSV-PCL + TNF- $\alpha$ | 1.000 | 0.907 | 0.000 | 0.187 | 0.479  |
|       |       | CTRL + TNF- $\alpha$ | vs | RSV + TNF- $\alpha$     | 1.071 | 1.095 | 0.325 | 0.507 | 0.841  |
|       |       | CTRL + TNF- $\alpha$ | vs | PCL + TNF- $\alpha$     | 1.071 | 0.735 | 0.325 | 0.331 | 0.396  |
|       |       | CTRL + TNF- $\alpha$ | vs | RSV-PCL + TNF- $\alpha$ | 1.071 | 0.907 | 0.325 | 0.187 | 0.360  |
|       |       | RSV + TNF- $\alpha$  | vs | PCL + TNF- $\alpha$     | 1.095 | 0.735 | 0.507 | 0.331 | 0.473  |

|               |       |                      |    |                         |       |       |       |       |        |
|---------------|-------|----------------------|----|-------------------------|-------|-------|-------|-------|--------|
|               |       | RSV + TNF- $\alpha$  | vs | RSV-PCL + TNF- $\alpha$ | 1.095 | 0.907 | 0.507 | 0.187 | 0.511  |
|               |       | PCL + TNF- $\alpha$  | vs | RSV-PCL + TNF- $\alpha$ | 0.735 | 0.907 | 0.331 | 0.187 | 0.428  |
|               | Day 3 | CTRL                 | vs | CTRL + TNF- $\alpha$    | 1.000 | 0.756 | 0.000 | 0.172 | 0.133  |
|               |       | CTRL                 | vs | RSV + TNF- $\alpha$     | 1.000 | 0.642 | 0.000 | 0.071 | 0.0129 |
|               |       | CTRL                 | vs | PCL + TNF- $\alpha$     | 1.000 | 0.750 | 0.000 | 0.272 | 0.252  |
|               |       | CTRL                 | vs | RSV-PCL + TNF- $\alpha$ | 1.000 | 0.710 | 0.000 | 0.264 | 0.196  |
|               |       | CTRL + TNF- $\alpha$ | vs | RSV + TNF- $\alpha$     | 0.756 | 0.642 | 0.172 | 0.071 | 0.442  |
|               |       | CTRL + TNF- $\alpha$ | vs | PCL + TNF- $\alpha$     | 0.756 | 0.750 | 0.172 | 0.272 | 0.942  |
|               |       | CTRL + TNF- $\alpha$ | vs | RSV-PCL + TNF- $\alpha$ | 0.756 | 0.710 | 0.172 | 0.264 | 0.476  |
|               |       | RSV + TNF- $\alpha$  | vs | PCL + TNF- $\alpha$     | 0.642 | 0.750 | 0.071 | 0.272 | 0.573  |
|               |       | RSV + TNF- $\alpha$  | vs | RSV-PCL + TNF- $\alpha$ | 0.642 | 0.710 | 0.071 | 0.264 | 0.727  |
|               |       | PCL + TNF- $\alpha$  | vs | RSV-PCL + TNF- $\alpha$ | 0.750 | 0.710 | 0.272 | 0.264 | 0.526  |
|               | Day 7 | CTRL                 | vs | CTRL + TNF- $\alpha$    | 1.000 | 0.455 | 0.000 | 0.252 | 0.064  |
|               |       | CTRL                 | vs | RSV + TNF- $\alpha$     | 1.000 | 0.472 | 0.000 | 0.119 | 0.016  |
|               |       | CTRL                 | vs | PCL + TNF- $\alpha$     | 1.000 | 0.615 | 0.000 | 0.245 | 0.112  |
|               |       | CTRL                 | vs | RSV-PCL + TNF- $\alpha$ | 1.000 | 0.458 | 0.000 | 0.252 | 0.064  |
|               |       | CTRL + TNF- $\alpha$ | vs | RSV + TNF- $\alpha$     | 0.455 | 0.472 | 0.252 | 0.119 | 0.867  |
|               |       | CTRL + TNF- $\alpha$ | vs | PCL + TNF- $\alpha$     | 0.455 | 0.615 | 0.252 | 0.245 | 0.391  |
|               |       | CTRL + TNF- $\alpha$ | vs | RSV-PCL + TNF- $\alpha$ | 0.455 | 0.458 | 0.252 | 0.252 | 0.980  |
|               |       | RSV + TNF- $\alpha$  | vs | PCL + TNF- $\alpha$     | 0.472 | 0.615 | 0.119 | 0.245 | 0.462  |
|               |       | RSV + TNF- $\alpha$  | vs | RSV-PCL + TNF- $\alpha$ | 0.472 | 0.458 | 0.119 | 0.252 | 0.932  |
|               |       | PCL + TNF- $\alpha$  | vs | RSV-PCL + TNF- $\alpha$ | 0.615 | 0.458 | 0.245 | 0.252 | 0.047  |
| $\alpha$ -SMA | Day 1 | CTRL                 | vs | CTRL + TNF- $\alpha$    | 1.000 | 0.790 | 0.000 | 0.130 | 0.108  |
|               |       | CTRL                 | vs | RSV + TNF- $\alpha$     | 1.000 | 0.941 | 0.000 | 0.255 | 0.725  |
|               |       | CTRL                 | vs | PCL + TNF- $\alpha$     | 1.000 | 0.752 | 0.000 | 0.169 | 0.126  |
|               |       | CTRL                 | vs | RSV-PCL + TNF- $\alpha$ | 1.000 | 1.206 | 0.000 | 0.101 | 0.071  |
|               |       | CTRL + TNF- $\alpha$ | vs | RSV + TNF- $\alpha$     | 0.790 | 0.941 | 0.130 | 0.255 | 0.216  |
|               |       | CTRL + TNF- $\alpha$ | vs | PCL + TNF- $\alpha$     | 0.790 | 0.752 | 0.130 | 0.169 | 0.449  |

|         |       |                      |    |                         |       |       |       |       |        |
|---------|-------|----------------------|----|-------------------------|-------|-------|-------|-------|--------|
|         |       | CTRL + TNF- $\alpha$ | vs | RSV-PCL + TNF- $\alpha$ | 0.790 | 1.206 | 0.130 | 0.101 | 0.011  |
|         |       | RSV + TNF- $\alpha$  | vs | PCL + TNF- $\alpha$     | 0.941 | 0.752 | 0.255 | 0.169 | 0.223  |
|         |       | RSV + TNF- $\alpha$  | vs | RSV-PCL + TNF- $\alpha$ | 0.941 | 1.206 | 0.255 | 0.101 | 0.177  |
|         |       | PCL + TNF- $\alpha$  | vs | RSV-PCL + TNF- $\alpha$ | 0.752 | 1.206 | 0.169 | 0.101 | 0.008  |
|         | Day 3 | CTRL                 | vs | CTRL + TNF- $\alpha$    | 1.000 | 1.597 | 0.000 | 0.124 | <0.001 |
|         |       | CTRL                 | vs | RSV + TNF- $\alpha$     | 1.000 | 0.523 | 0.000 | 0.048 | <0.001 |
|         |       | CTRL                 | vs | PCL + TNF- $\alpha$     | 1.000 | 1.216 | 0.000 | 0.070 | 0.033  |
|         |       | CTRL                 | vs | RSV-PCL + TNF- $\alpha$ | 1.000 | 0.602 | 0.000 | 0.057 | <0.001 |
|         |       | CTRL + TNF- $\alpha$ | vs | RSV + TNF- $\alpha$     | 1.597 | 0.523 | 0.124 | 0.048 | <0.001 |
|         |       | CTRL + TNF- $\alpha$ | vs | PCL + TNF- $\alpha$     | 1.597 | 1.216 | 0.124 | 0.070 | <0.001 |
|         |       | CTRL + TNF- $\alpha$ | vs | RSV-PCL + TNF- $\alpha$ | 1.597 | 0.602 | 0.124 | 0.057 | <0.001 |
|         |       | RSV + TNF- $\alpha$  | vs | PCL + TNF- $\alpha$     | 0.523 | 1.216 | 0.048 | 0.070 | <0.001 |
|         |       | RSV + TNF- $\alpha$  | vs | RSV-PCL + TNF- $\alpha$ | 0.523 | 0.602 | 0.048 | 0.057 | <0.001 |
|         |       | PCL + TNF- $\alpha$  | vs | RSV-PCL + TNF- $\alpha$ | 1.216 | 0.602 | 0.070 | 0.057 | <0.001 |
|         | Day 7 | CTRL                 | vs | CTRL + TNF- $\alpha$    | 1.000 | 1.717 | 0.000 | 0.549 | 0.152  |
|         |       | CTRL                 | vs | RSV + TNF- $\alpha$     | 1.000 | 0.824 | 0.000 | 0.391 | 0.518  |
|         |       | CTRL                 | vs | PCL + TNF- $\alpha$     | 1.000 | 1.928 | 0.000 | 0.485 | 0.080  |
|         |       | CTRL                 | vs | RSV-PCL + TNF- $\alpha$ | 1.000 | 1.083 | 0.000 | 0.249 | 0.623  |
|         |       | CTRL + TNF- $\alpha$ | vs | RSV + TNF- $\alpha$     | 1.717 | 0.824 | 0.549 | 0.391 | 0.029  |
|         |       | CTRL + TNF- $\alpha$ | vs | PCL + TNF- $\alpha$     | 1.717 | 1.928 | 0.549 | 0.485 | 0.165  |
|         |       | CTRL + TNF- $\alpha$ | vs | RSV-PCL + TNF- $\alpha$ | 1.717 | 1.083 | 0.549 | 0.249 | 0.069  |
|         |       | RSV + TNF- $\alpha$  | vs | PCL + TNF- $\alpha$     | 0.824 | 1.928 | 0.391 | 0.485 | 0.031  |
|         |       | RSV + TNF- $\alpha$  | vs | RSV-PCL + TNF- $\alpha$ | 0.824 | 1.083 | 0.391 | 0.249 | 0.123  |
|         |       | PCL + TNF- $\alpha$  | vs | RSV-PCL + TNF- $\alpha$ | 1.928 | 1.083 | 0.485 | 0.249 | 0.036  |
| ADAMTS4 | Day 1 | CTRL                 | vs | CTRL + TNF- $\alpha$    | 1.000 | 1.635 | 0.000 | 0.220 | 0.037  |
|         |       | CTRL                 | vs | RSV + TNF- $\alpha$     | 1.000 | 1.444 | 0.000 | 0.277 | 0.245  |
|         |       | CTRL                 | vs | PCL + TNF- $\alpha$     | 1.000 | 1.386 | 0.000 | 0.393 | 0.246  |
|         |       | CTRL                 | vs | RSV-PCL + TNF- $\alpha$ | 1.000 | 1.642 | 0.000 | 0.572 | 0.125  |

|  |       |                      |    |                         |       |       |       |       |        |
|--|-------|----------------------|----|-------------------------|-------|-------|-------|-------|--------|
|  |       | CTRL + TNF- $\alpha$ | vs | RSV + TNF- $\alpha$     | 1.635 | 1.444 | 0.220 | 0.277 | 0.238  |
|  |       | CTRL + TNF- $\alpha$ | vs | PCL + TNF- $\alpha$     | 1.635 | 1.386 | 0.220 | 0.393 | 0.125  |
|  |       | CTRL + TNF- $\alpha$ | vs | RSV-PCL + TNF- $\alpha$ | 1.635 | 1.642 | 0.220 | 0.572 | 0.756  |
|  |       | RSV + TNF- $\alpha$  | vs | PCL + TNF- $\alpha$     | 1.444 | 1.386 | 0.277 | 0.393 | 0.760  |
|  |       | RSV + TNF- $\alpha$  | vs | RSV-PCL + TNF- $\alpha$ | 1.444 | 1.642 | 0.277 | 0.572 | 0.369  |
|  |       | PCL + TNF- $\alpha$  | vs | RSV-PCL + TNF- $\alpha$ | 1.386 | 1.642 | 0.393 | 0.572 | 0.383  |
|  | Day 3 | CTRL                 | vs | CTRL + TNF- $\alpha$    | 1.000 | 2.194 | 0.000 | 0.597 | <0.001 |
|  |       | CTRL                 | vs | RSV + TNF- $\alpha$     | 1.000 | 1.662 | 0.000 | 0.439 | 0.255  |
|  |       | CTRL                 | vs | PCL + TNF- $\alpha$     | 1.000 | 2.570 | 0.000 | 0.668 | 0.246  |
|  |       | CTRL                 | vs | RSV-PCL + TNF- $\alpha$ | 1.000 | 2.151 | 0.000 | 0.212 | <0.001 |
|  |       | CTRL + TNF- $\alpha$ | vs | RSV + TNF- $\alpha$     | 2.194 | 1.662 | 0.597 | 0.439 | 0.122  |
|  |       | CTRL + TNF- $\alpha$ | vs | PCL + TNF- $\alpha$     | 2.194 | 2.570 | 0.597 | 0.668 | 0.376  |
|  |       | CTRL + TNF- $\alpha$ | vs | RSV-PCL + TNF- $\alpha$ | 2.194 | 2.151 | 0.597 | 0.212 | 0.747  |
|  |       | RSV + TNF- $\alpha$  | vs | PCL + TNF- $\alpha$     | 1.662 | 2.570 | 0.439 | 0.668 | 0.120  |
|  |       | RSV + TNF- $\alpha$  | vs | RSV-PCL + TNF- $\alpha$ | 1.662 | 2.151 | 0.439 | 0.212 | 0.122  |
|  |       | PCL + TNF- $\alpha$  | vs | RSV-PCL + TNF- $\alpha$ | 2.570 | 2.151 | 0.668 | 0.212 | 0.254  |
|  | Day 7 | CTRL                 | vs | CTRL + TNF- $\alpha$    | 1.000 | 1.265 | 0.000 | 0.485 | 0.376  |
|  |       | CTRL                 | vs | RSV + TNF- $\alpha$     | 1.000 | 1.673 | 0.000 | 0.174 | 0.021  |
|  |       | CTRL                 | vs | PCL + TNF- $\alpha$     | 1.000 | 1.887 | 0.000 | 1.012 | 0.253  |
|  |       | CTRL                 | vs | RSV-PCL + TNF- $\alpha$ | 1.000 | 1.522 | 0.000 | 0.428 | 0.239  |
|  |       | CTRL + TNF- $\alpha$ | vs | RSV + TNF- $\alpha$     | 1.265 | 1.673 | 0.485 | 0.174 | 0.243  |
|  |       | CTRL + TNF- $\alpha$ | vs | PCL + TNF- $\alpha$     | 1.265 | 1.887 | 0.485 | 1.012 | 0.254  |
|  |       | CTRL + TNF- $\alpha$ | vs | RSV-PCL + TNF- $\alpha$ | 1.265 | 1.522 | 0.485 | 0.428 | 0.380  |
|  |       | RSV + TNF- $\alpha$  | vs | PCL + TNF- $\alpha$     | 1.673 | 1.887 | 0.174 | 1.012 | 0.509  |
|  |       | RSV + TNF- $\alpha$  | vs | RSV-PCL + TNF- $\alpha$ | 1.673 | 1.522 | 0.174 | 0.428 | 0.380  |
|  |       | PCL + TNF- $\alpha$  | vs | RSV-PCL + TNF- $\alpha$ | 1.887 | 1.522 | 1.012 | 0.428 | 0.382  |
